# Supplementary material for: Association between the Quantity of Nurse–Doctor Interprofessional Collaboration and in-Patient Mortality: A Systematic Review
Source: MDPI journal article supplement (doi:10.3390/ijerph21040494), 2024-04-17
Supplement: s1 [file s1]

## MEDLINE

| S. No. | Searches                                                                                                                                                                                                                                                          |
|--------|-------------------------------------------------------------------------------------------------------------------------------------------------------------------------------------------------------------------------------------------------------------------|
| 1      | Patient Care Team/ or intersectoral collaboration/ or interprofessional relations/ or interdisciplinary communication/ or Physician-Nurse Relations/                                                                                                              |
| 2      | ((Interprofessional or "Inter professional" or Intersectoral or interdisciplinary or "inter disciplinary") adj3 (collaborat* or co-operat* or cooperat* or communicat* or interact* or relation* or discussion* or round* or meeting or teamwork or care)).ti,ab. |
| 3      | ((Multiprofessional or "multi professional" or multidisciplinary or "multi disciplinary") adj3 (collaborat* or co-operat* or cooperat* or communicat* or interact* or relation* or discussion* or round* or meeting or teamwork or care)).ti,ab.                  |
| 4      | ((crossdisciplinary or "cross disciplinary") adj3 (collaborat* or co-operat* or cooperat* or communicat* or interact* or relation* or discussion* or round* or meeting or teamwork or care)).ti,ab.                                                               |
| 5      | ((transdisciplinary or "trans disciplinary") adj3 (collaborat* or co-operat* or cooperat* or communicat* or interact* or relation* or discussion* or round* or meeting or teamwork or care)).ti,ab.                                                               |
| 6      | ((Interoccupation* or "inter occupation" or "inter occupational") adj3 (collaborat* or co-operat* or cooperat* or communicat* or interact* or relation* or discussion* or round* or meeting or teamwork or care)).ti,ab.                                          |
| 7      | ((("doctor nurse" or "physician nurse") adj3 (collaborat* or co-operat* or cooperat* or communicat* or interact* or relation* or discussion* or round* or meeting or teamwork or care)).ti,ab.                                                                    |
| 8      | 1 or 2 or 3 or 4 or 5 or 6 or 7                                                                                                                                                                                                                                   |
| 9      | Mortality/ or death/ or hospital mortality/                                                                                                                                                                                                                       |
| 10     | (death* or mortalit* or fatalit*).ti,ab.                                                                                                                                                                                                                          |
| 11     | 9 or 10                                                                                                                                                                                                                                                           |
| 12     | 8 and 11                                                                                                                                                                                                                                                          |

## EMBASE

| S. No. | Searches                                                                                                                                                                                                                                                          |
|--------|-------------------------------------------------------------------------------------------------------------------------------------------------------------------------------------------------------------------------------------------------------------------|
| 1      | doctor nurse relation/ or intersectoral collaboration/ or interdisciplinary communication/ or collaborative care team/ or patient care planning/                                                                                                                  |
| 2      | ((Interprofessional or "Inter professional" or Intersectoral or interdisciplinary or "inter disciplinary") adj3 (collaborat* or co-operat* or cooperat* or communicat* or interact* or relation* or discussion* or round* or meeting or teamwork or care)).ti,ab. |
| 3      | ((Multiprofessional or "multi professional" or multidisciplinary or "multi disciplinary") adj3 (collaborat* or co-operat* or cooperat* or communicat* or interact* or relation* or discussion* or round* or meeting or teamwork or care)).ti,ab.                  |
| 4      | ((crossdisciplinary or "cross disciplinary") adj3 (collaborat* or co-operat* or cooperat* or communicat* or interact* or relation* or discussion* or round* or meeting or teamwork or care)).ti,ab.                                                               |
| 5      | ((transdisciplinary or "trans disciplinary") adj3 (collaborat* or co-operat* or cooperat* or communicat* or interact* or relation* or discussion* or round* or meeting or teamwork or care)).ti,ab.                                                               |
| 6      | ((Interoccupation* or "inter occupation" or "inter occupational") adj3 (collaborat* or co-operat* or cooperat* or communicat* or interact* or relation* or discussion* or round* or meeting or teamwork or care)).ti,ab.                                          |
| 7      | ((("doctor nurse" or "physician nurse") adj3 (collaborat* or co-operat* or cooperat* or communicat* or interact* or relation* or discussion* or round* or meeting or teamwork or care)).ti,ab.                                                                    |
| 8      | 1 or 2 or 3 or 4 or 5 or 6 or 7                                                                                                                                                                                                                                   |
| 9      | mortality/ or death/ or mortality rate/ or hospital mortality/                                                                                                                                                                                                    |
| 10     | (death* or mortalit* or fatalit*).ti,ab.                                                                                                                                                                                                                          |
| 11     | 9 or 10                                                                                                                                                                                                                                                           |
| 12     | 8 and 11                                                                                                                                                                                                                                                          |

## PsycINFO

| S. No. | Searches                                                                                                                                                                                                                                                          |
|--------|-------------------------------------------------------------------------------------------------------------------------------------------------------------------------------------------------------------------------------------------------------------------|
| 1      | interdisciplinary treatment approach/ or interpersonal interaction/ or collaboration/                                                                                                                                                                             |
| 2      | ((Interprofessional or "Inter professional" or Intersectoral or interdisciplinary or "inter disciplinary") adj3 (collaborat* or co-operat* or cooperat* or communicat* or interact* or relation* or discussion* or round* or meeting or teamwork or care)).ti,ab. |
| 3      | ((Multiprofessional or "multi professional" or multidisciplinary or "multi disciplinary") adj3 (collaborat* or co-operat* or cooperat* or communicat* or interact* or relation* or discussion* or round* or meeting or teamwork or care)).ti,ab.                  |
| 4      | ((crossdisciplinary or "cross disciplinary") adj3 (collaborat* or co-operat* or cooperat* or communicat* or interact* or relation* or discussion* or round* or meeting or teamwork or care)).ti,ab.                                                               |
| 5      | ((transdisciplinary or "trans disciplinary") adj3 (collaborat* or co-operat* or cooperat* or communicat* or interact* or relation* or discussion* or round* or meeting or teamwork or care)).ti,ab.                                                               |
| 6      | ((Interoccupation* or "inter occupation" or "inter occupational") adj3 (collaborat* or co-operat* or cooperat* or communicat* or interact* or relation* or discussion* or round* or meeting or teamwork or care)).ti,ab.                                          |
| 7      | ((("doctor nurse" or "physician nurse") adj3 (collaborat* or co-operat* or cooperat* or communicat* or interact* or relation* or discussion* or round* or meeting or teamwork or care)).ti,ab.                                                                    |
| 8      | 1 or 2 or 3 or 4 or 5 or 6 or 7                                                                                                                                                                                                                                   |
| 9      | mortality rate/                                                                                                                                                                                                                                                   |
| 10     | (death* or mortalit* or fatalit*).ti,ab.                                                                                                                                                                                                                          |
| 11     | 9 or 10                                                                                                                                                                                                                                                           |
| 12     | 8 and 11                                                                                                                                                                                                                                                          |

## CINAHL Search Strategy

| S. No. | Search Terms                                                                                                                                                                                                                                                |
|--------|-------------------------------------------------------------------------------------------------------------------------------------------------------------------------------------------------------------------------------------------------------------|
| S1     | (MH "Multidisciplinary Care Team") or (MH "Interprofessional Relations") or (MH "Nurse-Physician Relations")                                                                                                                                                |
| S2     | TI ((Interprofessional or "Inter professional" or Intersectoral or interdisciplinary or "inter disciplinary") N3 (collaborat* OR co-operat* OR cooperat* OR communicat* OR interact* OR relation* OR discussion* OR round* OR meeting OR teamwork OR care)) |
| S3     | AB ((Interprofessional or "Inter professional" or Intersectoral or interdisciplinary or "inter disciplinary") N3 (collaborat* OR co-operat* OR cooperat* OR communicat* OR interact* OR relation* OR discussion* OR round* OR meeting OR teamwork OR care)) |
| S4     | TI (Multiprofessional or "multi professional" or multidisciplinary or "multi disciplinary") N3 (collaborat* OR co-operat* OR cooperat* OR communicat* OR interact* OR relation* OR discussion* OR round* OR meeting OR teamwork OR care))                   |
| S5     | AB (Multiprofessional or "multi professional" or multidisciplinary or "multi disciplinary") N3 (collaborat* OR co-operat* OR cooperat* OR communicat* OR interact* OR relation* OR discussion* OR round* OR meeting OR teamwork OR care))                   |
| S6     | TI ((crossdisciplinary or "cross disciplinary") N3 (collaborat* OR co-operat* OR cooperat* OR communicat* OR interact* OR relation* OR discussion* OR round* OR meeting OR teamwork OR care))                                                               |
| S7     | AB ((crossdisciplinary or "cross disciplinary") N3 (collaborat* OR co-operat* OR cooperat* OR communicat* OR interact* OR relation* OR discussion* OR round* OR meeting OR teamwork OR care))                                                               |
| S8     | TI ((Interoccupation* or "inter occupation" or "inter occupational") N3 (collaborat* OR co-operat* OR cooperat* OR communicat* OR interact* OR relation* OR discussion* OR round* OR meeting OR teamwork OR care))                                          |
| S9     | AB ((Interoccupation* or "inter occupation" or "inter occupational") N3 (collaborat* OR co-operat* OR cooperat* OR communicat* OR interact* OR relation* OR discussion* OR round* OR meeting OR teamwork OR care))                                          |
| S10    | TI ((transdisciplinary or "trans disciplinary") N3 (collaborat* OR co-operat* OR cooperat* OR communicat* OR interact* OR relation* OR discussion* OR round* OR meeting OR teamwork OR care))                                                               |
| S11    | AB ((transdisciplinary or "trans disciplinary") N3 (collaborat* OR co-operat* OR cooperat* OR communicat* OR interact* OR relation* OR discussion* OR round* OR meeting OR teamwork OR care))                                                               |
| S12    | TI (("doctor nurse" or "physician nurse") N3 (collaborat* OR co-operat* OR cooperat* OR communicat* OR interact* OR relation* OR discussion* OR round* OR meeting OR teamwork OR care))                                                                     |
| S13    | AB (("doctor nurse" or "physician nurse") N3 (collaborat* OR co-operat* OR cooperat* OR communicat* OR interact* OR relation* OR discussion* OR round* OR meeting OR teamwork OR care))                                                                     |
| S14    | S1 OR S2 OR S3 OR S4 OR S5 OR S6 OR S7 OR S8 OR S9 OR S10 OR S11 OR S12 OR S13                                                                                                                                                                              |
| S15    | (MH "Mortality") OR (MH "Death") OR (MH "Hospital Mortality")                                                                                                                                                                                               |
| S16    | TI (death* or mortalit* or fatalit*)                                                                                                                                                                                                                        |
| S17    | AB (death* or mortalit* or fatalit*)                                                                                                                                                                                                                        |
| S18    | S15 OR S16 OR S17                                                                                                                                                                                                                                           |
| S19    | S14 AND S18                                                                                                                                                                                                                                                 |

## Cochrane database

| S. No. | Search                                                                                                                                                                                                                                                           |
|--------|------------------------------------------------------------------------------------------------------------------------------------------------------------------------------------------------------------------------------------------------------------------|
| 1      | MeSH descriptor: [Interprofessional Relations] explode all trees                                                                                                                                                                                                 |
| 2      | MeSH descriptor: [Patient Care Planning] explode all trees                                                                                                                                                                                                       |
| 3      | MeSH descriptor: [Physician-Nurse Relations] explode all trees                                                                                                                                                                                                   |
| 4      | (Interprofessional or "Inter professional" or Intersectoral or interdisciplinary or "inter disciplinary") NEAR/3 (collaborat* OR co-operat* OR cooperat* OR communicat* OR interact* OR relation* OR discussion* OR round* OR meeting OR teamwork OR care):ti,ab |
| 5      | (Multiprofessional or "multi professional" or multidisciplinary or "multi disciplinary") NEAR/3 (collaborat* OR co-operat* OR cooperat* OR communicat* OR interact* OR relation* OR discussion* OR round* OR meeting OR teamwork OR care):ti,ab                  |
| 6      | (crossdisciplinary or "cross disciplinary") NEAR/3 (collaborat* OR co-operat* OR cooperat* OR communicat* OR interact* OR relation* OR discussion* OR round* OR meeting OR teamwork OR care):ti,ab                                                               |
| 7      | (transdisciplinary or "trans disciplinary") NEAR/3 (collaborat* OR co-operat* OR cooperat* OR communicat* OR interact* OR relation* OR discussion* OR round* OR meeting OR teamwork OR care):ti,ab                                                               |
| 8      | ((Interoccupation* or "inter occupation" or "inter occupational") NEAR/3 (collaborat* OR co-operat* OR cooperat* OR communicat* OR interact* OR relation* OR discussion* OR round* OR meeting OR teamwork OR care)):ti,ab                                        |
| 9      | ("doctor nurse" OR "physician nurse") NEAR/3 (collaborat* OR co-operat* OR cooperat* OR communicat* OR interact* OR relation* OR discussion* OR round* OR meeting OR teamwork OR care):ti,ab                                                                     |
| 10     | #1 or #2 or #3 or #4 or #5 or #6 or #7 or #8 or #9                                                                                                                                                                                                               |
| 11     | MeSH descriptor: [Death] explode all trees                                                                                                                                                                                                                       |
| 12     | MeSH descriptor: [Mortality] explode all trees                                                                                                                                                                                                                   |
| 13     | (Death* or mortalit* or fatalit*):ti,ab                                                                                                                                                                                                                          |
| 14     | #11 or #12 or #13                                                                                                                                                                                                                                                |
| 15     | #10 AND #14                                                                                                                                                                                                                                                      |
