# Supplementary material for: Association between the Quantity of Nurse–Doctor Interprofessional Collaboration and in-Patient Mortality: A Systematic Review
Source: MDPI journal article supplement (doi:10.3390/ijerph21040494), 2024-04-17
Supplement: s1 [file s1]

## Supplementary document 4: Risk of bias assessment

| Section | Criteria                                                                                                                                                                                                                                                                                                                                                                                                                                                                                                                                                                                                                                                                                                                                  | Baggs (1990)<br>Baggs et al. (1992) | Baggs et al.,<br>(1999)   | Kang (2016)<br>Kang et al.<br>(2020) |
|---------|-------------------------------------------------------------------------------------------------------------------------------------------------------------------------------------------------------------------------------------------------------------------------------------------------------------------------------------------------------------------------------------------------------------------------------------------------------------------------------------------------------------------------------------------------------------------------------------------------------------------------------------------------------------------------------------------------------------------------------------------|-------------------------------------|---------------------------|--------------------------------------|
| 1       | <b>Selection bias</b>                                                                                                                                                                                                                                                                                                                                                                                                                                                                                                                                                                                                                                                                                                                     |                                     |                           |                                      |
|         | Are the individuals selected to participate in the study likely to be representative of the target population?<br>1 Very likely      2 Somewhat likely<br>3 Not likely      4 Cannot tell                                                                                                                                                                                                                                                                                                                                                                                                                                                                                                                                                 |                                     |                           |                                      |
| 1       |                                                                                                                                                                                                                                                                                                                                                                                                                                                                                                                                                                                                                                                                                                                                           | 1                                   | 1                         | 2                                    |
|         | What percentage of selected individuals agreed to participate?<br>1 80 - 100% agreement      2 60 – 79% agreement<br>3 less than 60% agreement      4 Not applicable      5 Cannot tell                                                                                                                                                                                                                                                                                                                                                                                                                                                                                                                                                   |                                     |                           |                                      |
| 1       |                                                                                                                                                                                                                                                                                                                                                                                                                                                                                                                                                                                                                                                                                                                                           | 1                                   | 2                         | 5                                    |
|         | <b>Rate this section</b><br><b>Strong:</b> The selected individuals are very likely to be representative of the target population (Q1 is 1) and there is greater than 80% participation (Q2 is 1).<br><b>Moderate:</b> The selected individuals are at least somewhat likely to be representative of the target population (Q1 is 1 or 2); and there is 60 - 79% participation (Q2 is 2). 'Moderate' may also be assigned if Q1 is 1 or 2 and Q2 is 5 (can't tell).<br><b>Weak:</b> The selected individuals are not likely to be representative of the target population (Q1 is 3); or there is less than 60% participation (Q2 is 3) or selection is not described (Q1 is 4); and the level of participation is not described (Q2 is 5) | 1                                   | 2                         | 2                                    |
| 2       | <b>Study design</b>                                                                                                                                                                                                                                                                                                                                                                                                                                                                                                                                                                                                                                                                                                                       |                                     |                           |                                      |
|         | Indicate the study design<br>1 Randomised controlled trial      2 Controlled clinical trial<br>3 Cohort analytic (two group pre + post)<br>4 Case-control<br>5 Cohort (one group pre + post (before and after))<br>6 Interrupted time series<br>7 Other specify _____      8 Cannot tell                                                                                                                                                                                                                                                                                                                                                                                                                                                  | prospective observational           | prospective observational | secondary data                       |
| 1       |                                                                                                                                                                                                                                                                                                                                                                                                                                                                                                                                                                                                                                                                                                                                           |                                     |                           |                                      |
| 2       | Was the study described as randomised? (If NO, go to Component C)                                                                                                                                                                                                                                                                                                                                                                                                                                                                                                                                                                                                                                                                         | No                                  | No                        | No                                   |
| 3       | If Yes, was the method of randomisation described?                                                                                                                                                                                                                                                                                                                                                                                                                                                                                                                                                                                                                                                                                        |                                     |                           |                                      |
| 4       | If Yes, was the method appropriate?                                                                                                                                                                                                                                                                                                                                                                                                                                                                                                                                                                                                                                                                                                       |                                     |                           |                                      |
|         | <b>Rate this section</b><br><b>Strong:</b> will be assigned to those articles that described RCTs and CCTs.<br><b>Moderate:</b> will be assigned to those that described a cohort analytic study, a case control study, a cohort design, or an interrupted time series.<br><b>Weak:</b> will be assigned to those that used any other method or did not state the method used.                                                                                                                                                                                                                                                                                                                                                            | 3                                   | 3                         | 3                                    |
| 3       | <b>Confounders</b>                                                                                                                                                                                                                                                                                                                                                                                                                                                                                                                                                                                                                                                                                                                        |                                     |                           |                                      |
|         | Were there important differences between groups prior to the intervention?<br>1 Yes    2 No    3 Cannot tell                                                                                                                                                                                                                                                                                                                                                                                                                                                                                                                                                                                                                              |                                     |                           |                                      |
| 1       |                                                                                                                                                                                                                                                                                                                                                                                                                                                                                                                                                                                                                                                                                                                                           | 1                                   | 1                         | 1                                    |
|         | If yes, indicate the percentage of relevant confounders that were controlled (either in the design (e.g. stratification, matching) or analysis)?<br>1 80 – 100% (most)<br>2 60 – 79% (some)<br>3 Less than 60% (few or none)<br>4 Cannot Tell                                                                                                                                                                                                                                                                                                                                                                                                                                                                                             |                                     |                           |                                      |
| 2       |                                                                                                                                                                                                                                                                                                                                                                                                                                                                                                                                                                                                                                                                                                                                           | 3                                   | 3                         | 3                                    |
|         | <b>Rate this section</b><br><b>Strong:</b> will be assigned to those articles that controlled for at least 80% of relevant confounders (Q1 is 2); or (Q2 is 1).<br><b>Moderate:</b> will be given to those studies that controlled for 60 – 79% of relevant confounders (Q1 is 1) and (Q2 is 2).<br><b>Weak:</b> will be assigned when less than 60% of relevant confounders were controlled (Q1 is 1) and (Q2 is 3) or control of confounders was not described (Q1 is 3) and (Q2 is 4).                                                                                                                                                                                                                                                 | 3                                   | 3                         | 3                                    |

|                                                                                                                                                                                                                                                                                                                                                                                                                                                                                                                                                                                                                                         |                                                                                                                                   |            |            |            |
|-----------------------------------------------------------------------------------------------------------------------------------------------------------------------------------------------------------------------------------------------------------------------------------------------------------------------------------------------------------------------------------------------------------------------------------------------------------------------------------------------------------------------------------------------------------------------------------------------------------------------------------------|-----------------------------------------------------------------------------------------------------------------------------------|------------|------------|------------|
| 4                                                                                                                                                                                                                                                                                                                                                                                                                                                                                                                                                                                                                                       | <b>Blinding</b>                                                                                                                   |            |            |            |
|                                                                                                                                                                                                                                                                                                                                                                                                                                                                                                                                                                                                                                         | Was (were) the outcome assessor(s) aware of the intervention or exposure status of participants?                                  |            |            |            |
| 1                                                                                                                                                                                                                                                                                                                                                                                                                                                                                                                                                                                                                                       | 1 Yes      2 No      3 Cannot tell                                                                                                | 3          | 3          | 3          |
|                                                                                                                                                                                                                                                                                                                                                                                                                                                                                                                                                                                                                                         | Were the study participants aware of the research question?                                                                       |            |            |            |
| 2                                                                                                                                                                                                                                                                                                                                                                                                                                                                                                                                                                                                                                       | 1 Yes      2 No      3 Cannot tell                                                                                                | 3          | 3          | 3          |
| <b>Rate this section</b><br><b>Strong:</b> The outcome assessor is not aware of the intervention status of participants (Q1 is 2); and the study participants are not aware of the research question (Q2 is 2).<br><b>Moderate:</b> The outcome assessor is not aware of the intervention status of participants (Q1 is 2); or the study participants are not aware of the research question (Q2 is 2).<br><b>Weak:</b> The outcome assessor is aware of the intervention status of participants (Q1 is 1); and the study participants are aware of the research question (Q2 is 1); or blinding is not described (Q1 is 3 and Q2 is 3) |                                                                                                                                   | 3          | 3          | 3          |
| 5                                                                                                                                                                                                                                                                                                                                                                                                                                                                                                                                                                                                                                       | <b>Data collection methods</b>                                                                                                    |            |            |            |
|                                                                                                                                                                                                                                                                                                                                                                                                                                                                                                                                                                                                                                         | Were data collection tools shown to be valid?                                                                                     |            |            |            |
| 1                                                                                                                                                                                                                                                                                                                                                                                                                                                                                                                                                                                                                                       | 1 Yes      2 No      3 Cannot tell                                                                                                | 1          | 1          | 1          |
|                                                                                                                                                                                                                                                                                                                                                                                                                                                                                                                                                                                                                                         | Were data collection tools shown to be reliable?                                                                                  |            |            |            |
| 2                                                                                                                                                                                                                                                                                                                                                                                                                                                                                                                                                                                                                                       | 1 Yes      2 No      3 Cannot tell                                                                                                | 1          | 1          | 1          |
| <b>Rate this section</b><br><b>Strong:</b> The data collection tools have been shown to be valid (Q1 is 1); and the data collection tools have been shown to be reliable (Q2 is 1).<br><b>Moderate:</b> The data collection tools have been shown to be valid (Q1 is 1); and the data collection tools have not been shown to be reliable (Q2 is 2) or reliability is not described (Q2 is 3).<br><b>Weak:</b> The data collection tools have not been shown to be valid (Q1 is 2) or both reliability and validity are not described (Q1 is 3 and Q2 is 3).                                                                            |                                                                                                                                   | 1          | 1          | 1          |
| 6                                                                                                                                                                                                                                                                                                                                                                                                                                                                                                                                                                                                                                       | <b>Withdrawals and drop-outs</b>                                                                                                  |            |            |            |
|                                                                                                                                                                                                                                                                                                                                                                                                                                                                                                                                                                                                                                         | Were withdrawals and drop-outs reported in terms of numbers and/or reasons per group?                                             |            |            |            |
| 1                                                                                                                                                                                                                                                                                                                                                                                                                                                                                                                                                                                                                                       | 1 Yes   2 No   3 Cannot tell<br>4 Not Applicable (i.e. one-time surveys or interviews)                                            | 4          | 4          | 4          |
|                                                                                                                                                                                                                                                                                                                                                                                                                                                                                                                                                                                                                                         | Indicate the percentage of participants completing the study. (If the percentage differs by groups, record the lowest).           |            |            |            |
| 2                                                                                                                                                                                                                                                                                                                                                                                                                                                                                                                                                                                                                                       | 1 80 -100%   2 60 - 79%   3 < 60%   4 Cannot tell   5 Not Applicable (i.e. Retrospective case-control)                            | 5          | 5          | 5          |
| <b>Rate this section</b><br><b>Strong:</b> will be assigned when the follow-up rate is 80% or greater (Q1 is 1 and Q2 is 1).<br><b>Moderate:</b> will be assigned when the follow-up rate is 60 – 79% (Q2 is 2) OR Q1 is 4 or Q2 is 5.<br><b>Weak:</b> will be assigned when a follow-up rate is less than 60% (Q2 is 3) or if the withdrawals and drop-outs were not described (Q1 is No or Q2 is 4).<br><b>Not Applicable:</b> if Q1 is 4 or Q2 is 5.                                                                                                                                                                                 |                                                                                                                                   | N/A        | N/A        | N/A        |
| 7                                                                                                                                                                                                                                                                                                                                                                                                                                                                                                                                                                                                                                       | <b>Intervention integrity</b>                                                                                                     |            |            |            |
|                                                                                                                                                                                                                                                                                                                                                                                                                                                                                                                                                                                                                                         | What percentage of participants received the allocated intervention or exposure of interest?                                      |            |            |            |
| 1                                                                                                                                                                                                                                                                                                                                                                                                                                                                                                                                                                                                                                       | 1 80 -100%   2 60 - 79%   3 < 60%   4 Cannot tell                                                                                 | 4          | 4          | 4          |
|                                                                                                                                                                                                                                                                                                                                                                                                                                                                                                                                                                                                                                         | Is it likely that subjects received an unintended intervention (contamination or co-intervention) that may influence the results? |            |            |            |
| 2                                                                                                                                                                                                                                                                                                                                                                                                                                                                                                                                                                                                                                       | 1 Yes      2 No      3 Cannot tell                                                                                                | 3          | 3          | 3          |
| 8                                                                                                                                                                                                                                                                                                                                                                                                                                                                                                                                                                                                                                       | <b>Analysis</b>                                                                                                                   |            |            |            |
|                                                                                                                                                                                                                                                                                                                                                                                                                                                                                                                                                                                                                                         | Indicate the unit of allocation                                                                                                   |            |            |            |
| 1                                                                                                                                                                                                                                                                                                                                                                                                                                                                                                                                                                                                                                       | 1. community<br>2. organisation/institution<br>3. practice/office<br>4. individual                                                | individual | individual | individual |

|   |                                                                                                                                                                            |             |             |                          |
|---|----------------------------------------------------------------------------------------------------------------------------------------------------------------------------|-------------|-------------|--------------------------|
| 2 | Indicate the unit of analysis<br>1. community<br>2. organisation/institution<br>3. practice/office<br>4. individual                                                        | individual  | individual  | organization/institution |
| 3 | Are the statistical methods appropriate for the study design?<br>1 Yes      2 No      3 Cannot tell                                                                        | 1           | 1           | 1                        |
| 4 | Is the analysis performed by intervention allocation status (i.e., intention to treat) rather than the actual intervention received?<br>1 Yes      2 No      3 Cannot tell | N/A         | N/A         | N/A                      |
|   | <b>Global Rating</b>                                                                                                                                                       |             |             |                          |
| 1 | <b>Selection bias</b><br>1. Strong      2. Moderate      3. Weak                                                                                                           | 1           | 2           | 2                        |
| 2 | <b>Study design</b><br>1. Strong      2. Moderate      3. Weak                                                                                                             | 3           | 3           | 3                        |
| 3 | <b>Confounders</b><br>1. Strong      2. Moderate      3. Weak                                                                                                              | 3           | 3           | 3                        |
| 4 | <b>Blinding</b><br>1. Strong      2. Moderate      3. Weak                                                                                                                 | 3           | 3           | 3                        |
| 5 | <b>Data collection method</b><br>1. Strong      2. Moderate      3. Weak                                                                                                   | 1           | 1           | 1                        |
| 6 | <b>Withdrawals and dropouts</b><br>1. Strong      2. Moderate      3. Weak                                                                                                 | N/A         | N/A         | N/A                      |
|   | <b>Global rating for this paper</b><br>1 Strong (no WEAK ratings)<br>2 Moderate (one WEAK rating)<br>3 Weak (two or more WEAK ratings)                                     | <b>Weak</b> | <b>Weak</b> | <b>Weak</b>              |
