# Supplementary material for: Association between the Quantity of Nurse–Doctor Interprofessional Collaboration and in-Patient Mortality: A Systematic Review
Source: Int J Environ Res Public Health. 2024 Apr 17;21(4):494. doi: 10.3390/ijerph21040494 (PMC11050129; doi:10.3390/ijerph21040494)
Supplement: Supplementary file 1 [file ijerph-21-00494-s001.zip]

Archive with 4 entries (4 files):
- Supplementary material S1_PRISMA Checklist.pdf
- Supplementary material S2_Search Strategy.pdf
- Supplementary material S3_Characteristics of the measures of collaboration.pdf
- Supplementary material S4_Risk of bias of the included studies.pdf
